# Supplementary material for: Glyoxalase I reduces glycative and oxidative stress and prevents age-related endothelial dysfunction through modulation of endothelial nitric oxide synthase phosphorylation
Source: PubMed Central journal article supplement (PMC4326886; doi:10.1111/acel.12204), 2014-02-24

# Supplemental figure I.

Young

Mid-age

WT

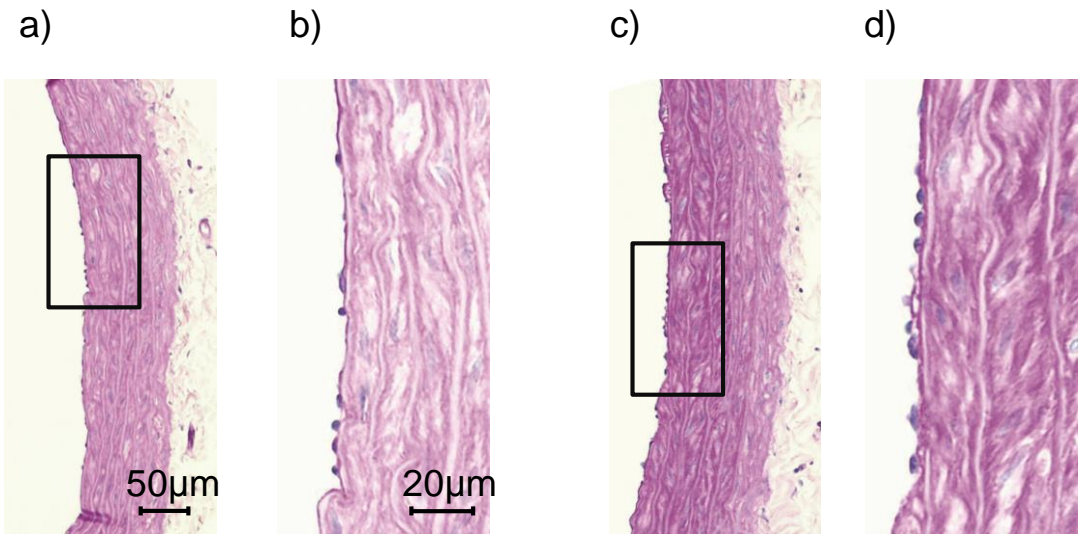

*GLO1*  
Tg

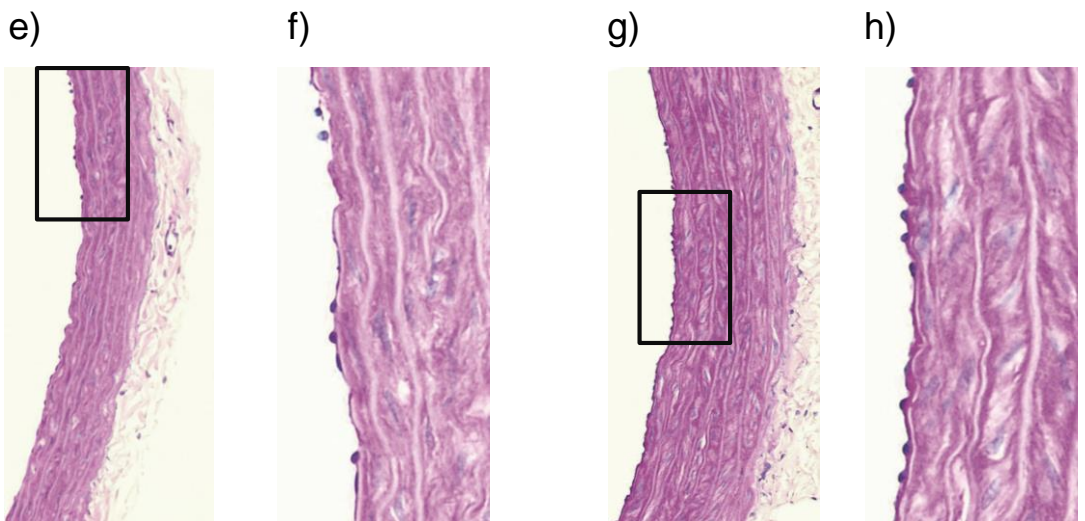

## Supplemental figure II.

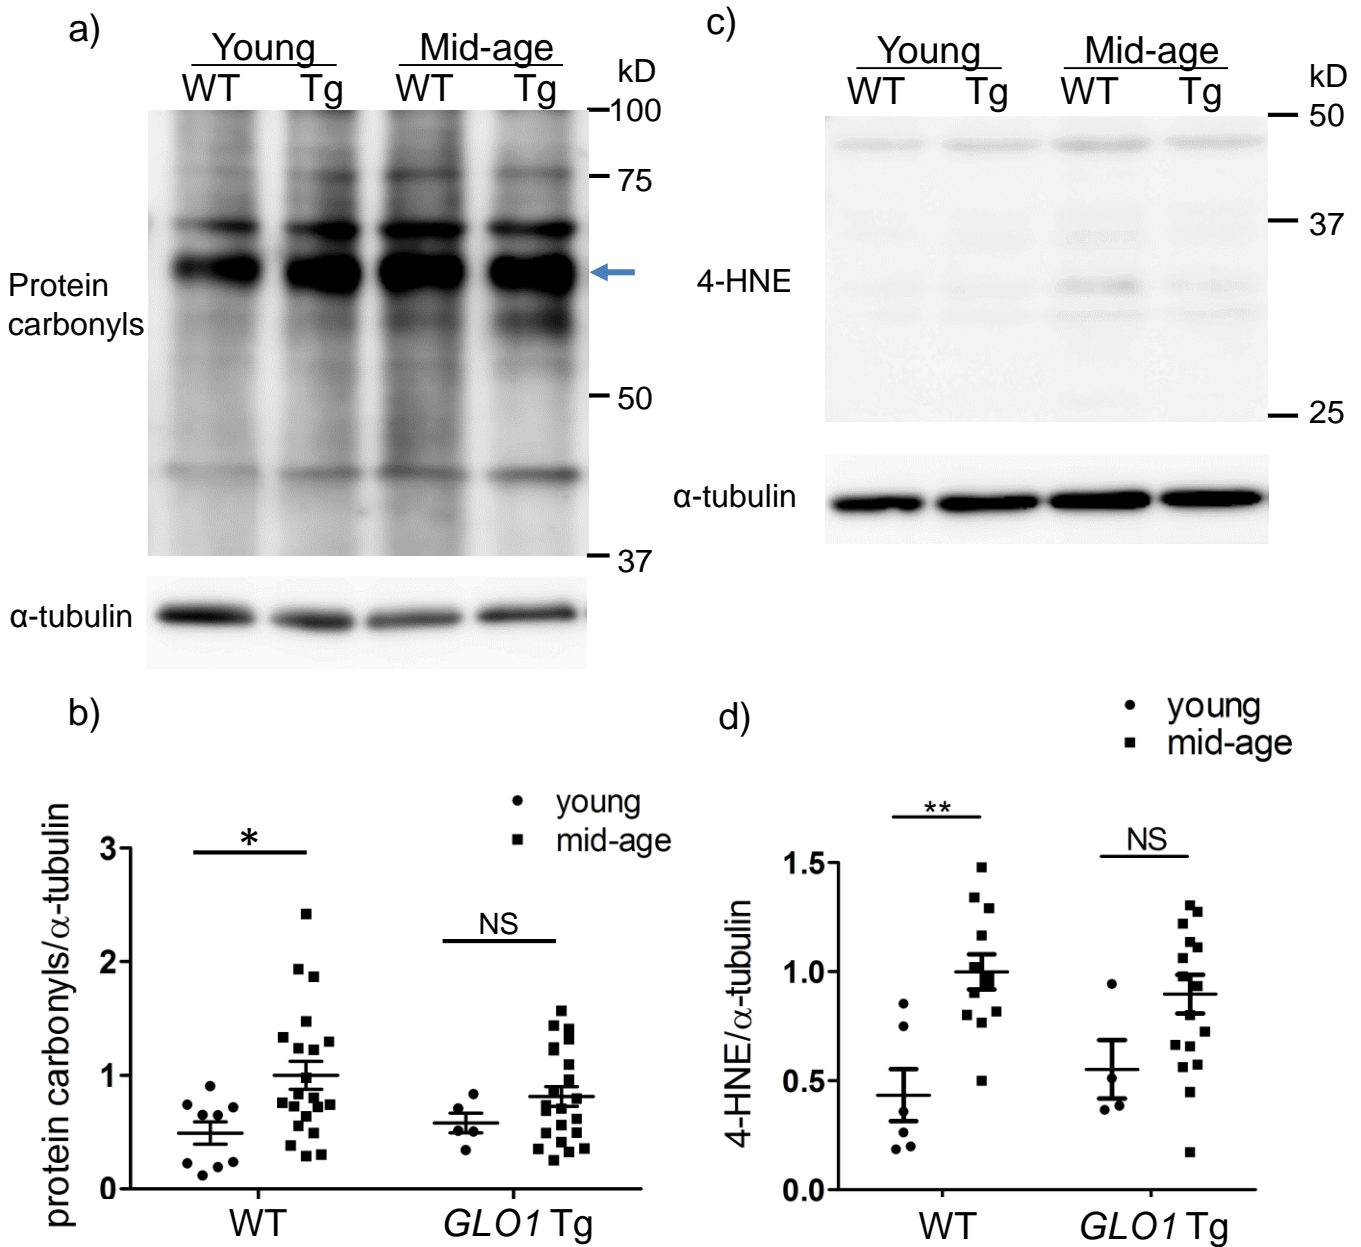

# Supplemental figure III.

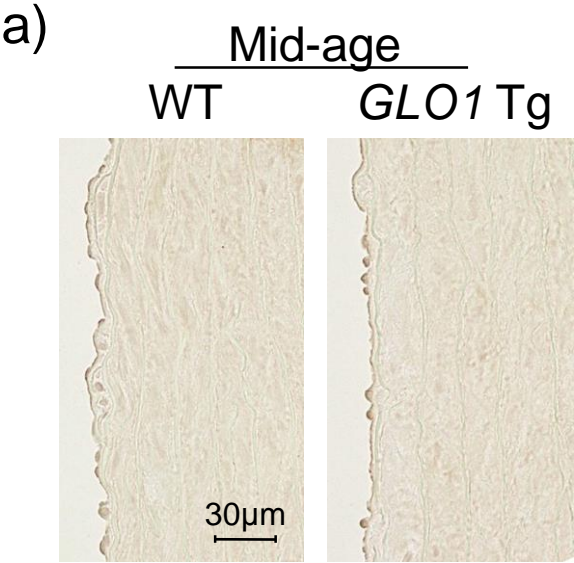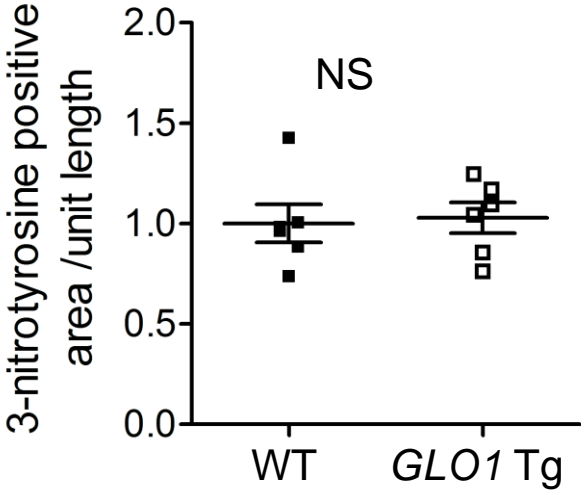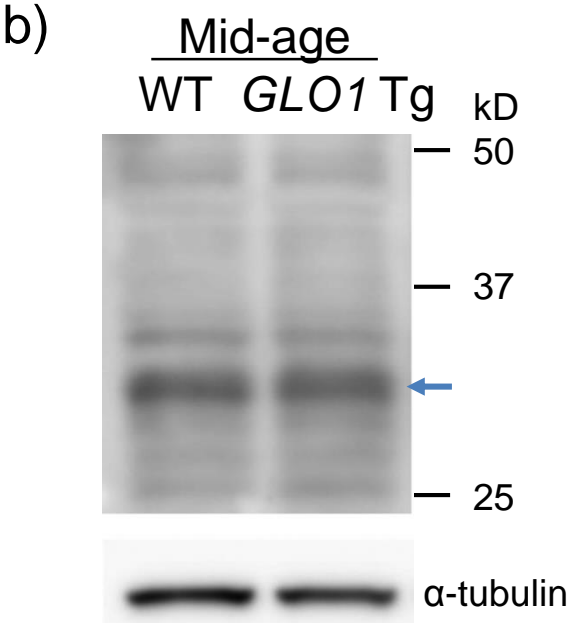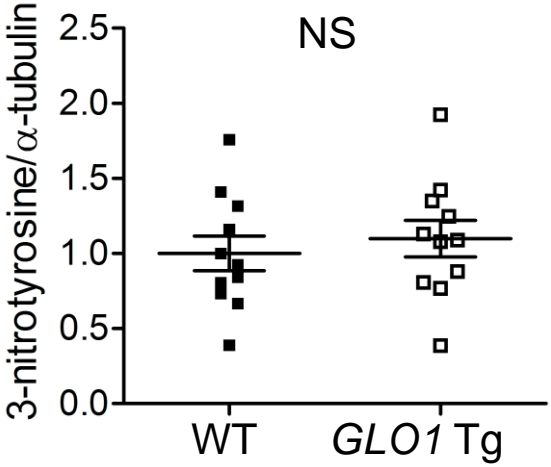

# Supplemental figure IV.

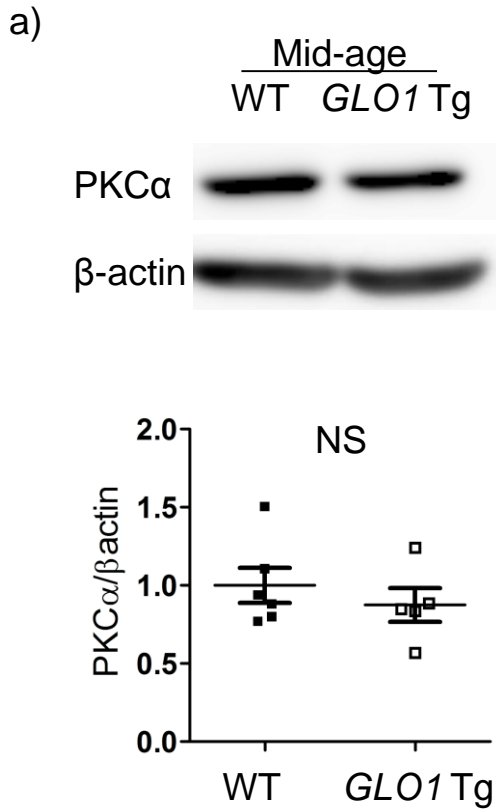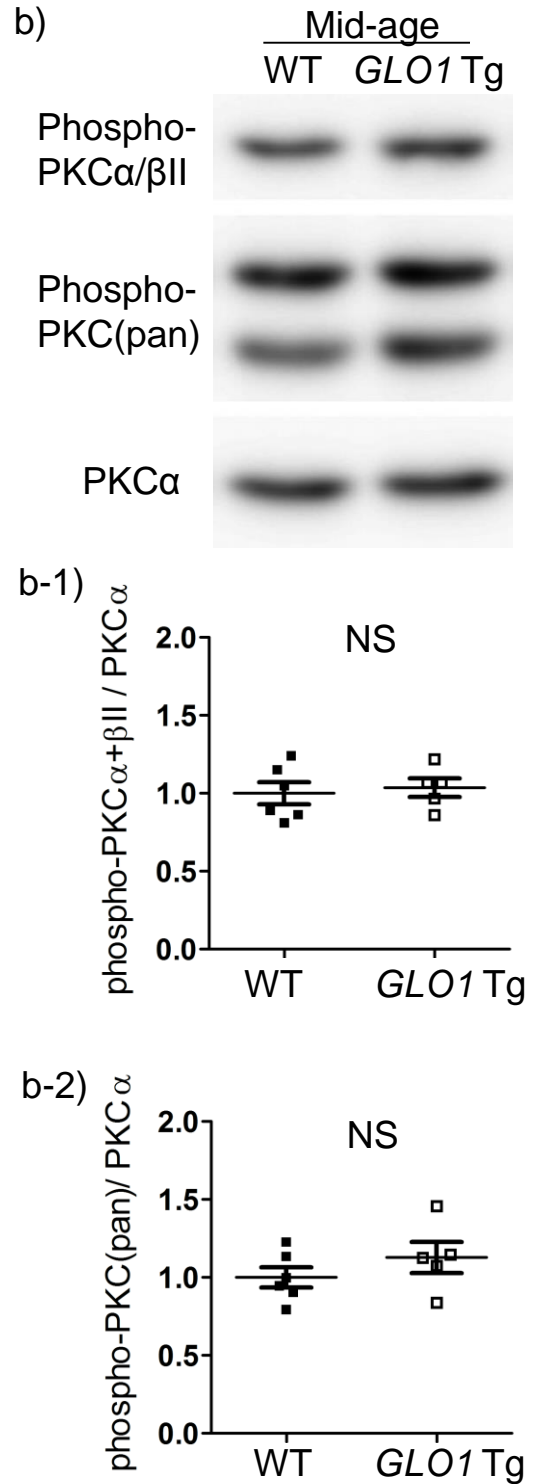

# Supplemental figure V.

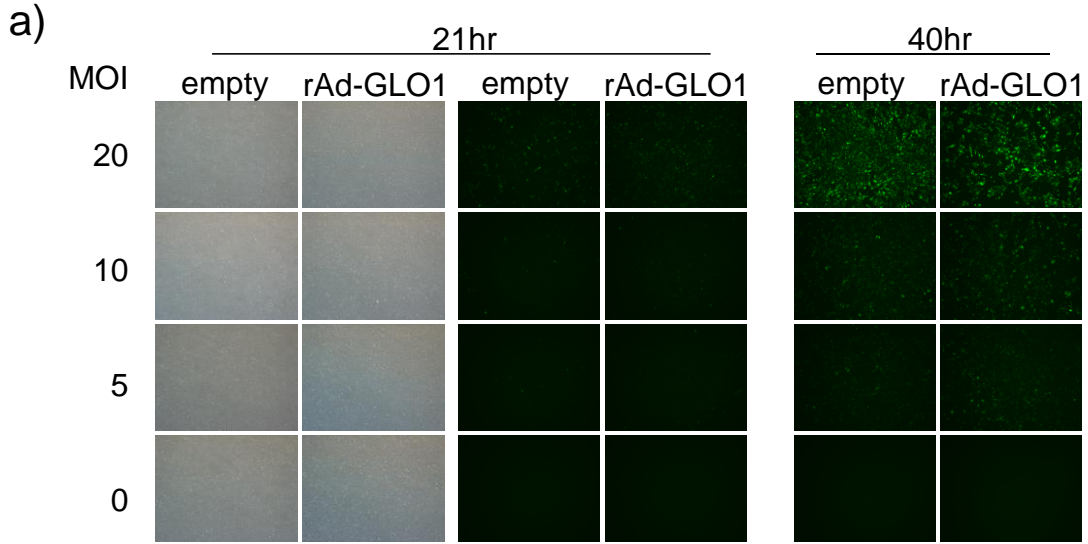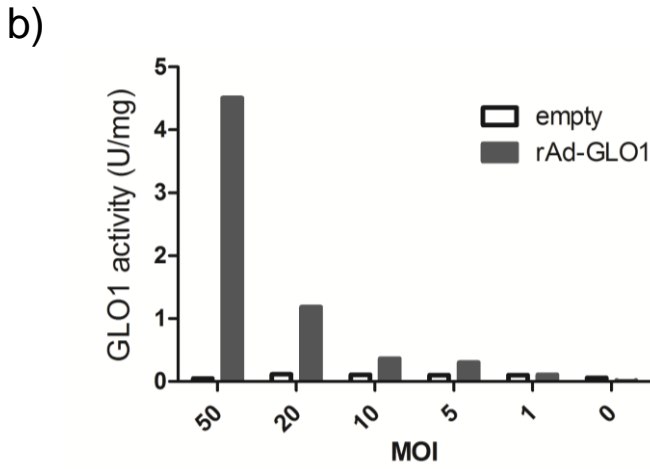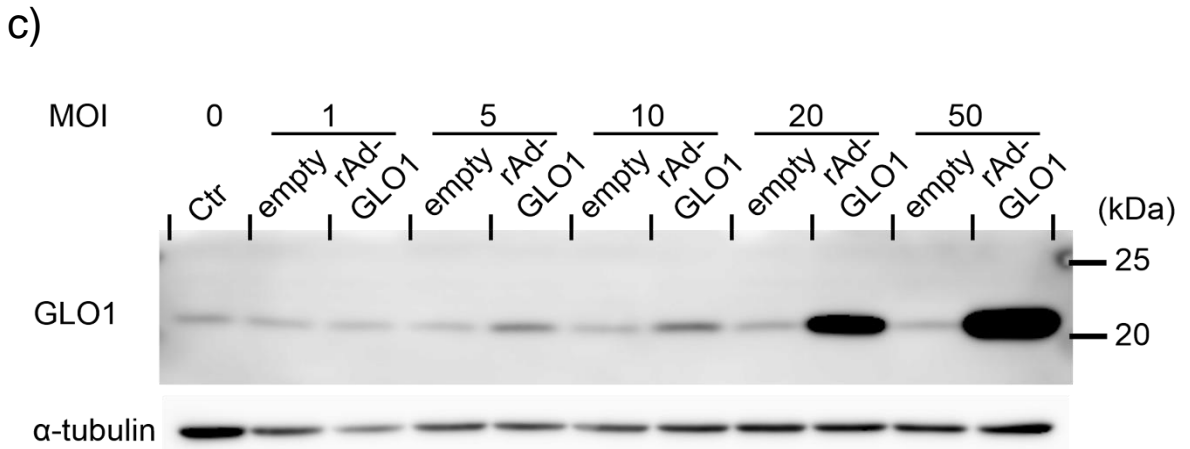

Supplement: acel0013-0519-sd1.pdf [file acel0013-0519-sd1.pdf]
